# Supplementary material for: Enhancement of the thermoelectric performance via defect formation and device fabrication for Cu 26 Ti 2 (Sb,Ge) 6 S 32 colusite
Source: Royal Society of Chemistry journal article supplement (doi:10.1039/d5ta08599c), 2026-01-01
Supplement: d5ta08599c1.pdf [file d5ta08599c1.pdf]

Supplementary information

**Enhancement of the thermoelectric performance via defect formation and device fabrication  
for  $\text{Cu}_{26}\text{Ti}_2(\text{Sb,Ge})_6\text{S}_{32}$  colusite**

Koichiro Suekuni,<sup>\*,a,b</sup> Mei Yamamoto,<sup>a</sup> Susumu Fujii,<sup>c</sup> Pierric Lemoine,<sup>d</sup> Philipp Sauerschnig,<sup>e</sup>  
Michihiro Ohta,<sup>e</sup> Emmanuel Guilmeau,<sup>f</sup> Michitaka Ohtaki<sup>a,b</sup>

<sup>a</sup> *Interdisciplinary Graduate School of Engineering Sciences, Kyushu University, Kasuga, Fukuoka 816-8580, Japan*

<sup>b</sup> *Transdisciplinary Research and Education Center for Green Technologies, Kyushu University, Kasuga, Fukuoka 816-8580, Japan*

<sup>c</sup> *Department of Materials, Faculty of Engineering, Kyushu University, Motoooka, Fukuoka 819-0395, Japan*

<sup>d</sup> *Université de Lorraine, CNRS, IJL, F-54000, Nancy, France*

<sup>e</sup> *Global Zero Emission Research Center, National Institute of Advanced Industrial Science and Technology (AIST), Tsukuba, Ibaraki 305-8569, Japan*

<sup>f</sup> *CRISMAT, CNRS, Normandie Université, ENSICAEN, UNICAEN, Caen 14000, France*

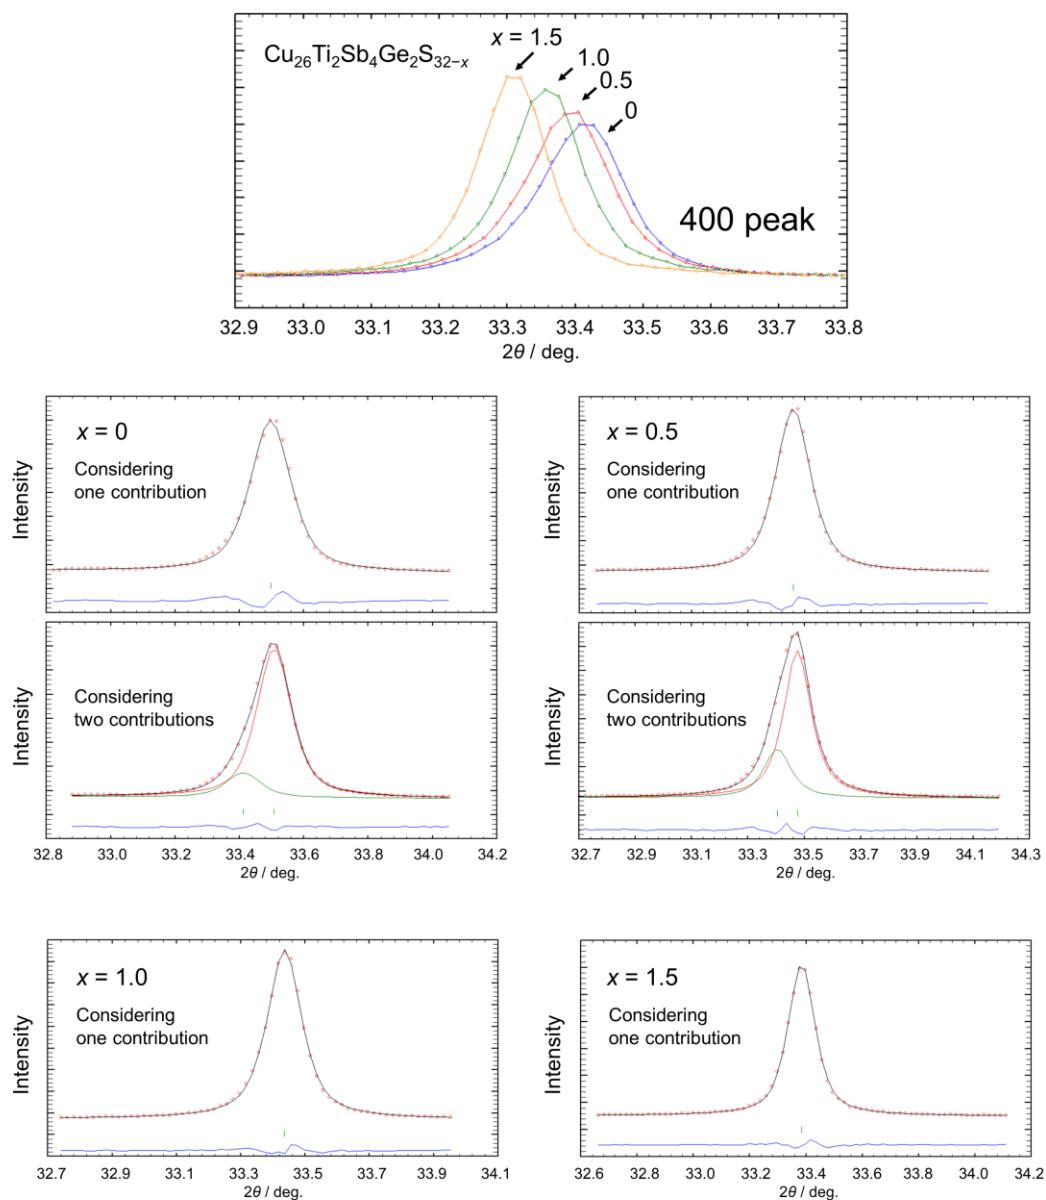

Figure S1. Powder X-ray diffraction patterns (CuK $\alpha_1$ ) near the 400 peaks for the samples of  $\text{Cu}_{26}\text{Ti}_2\text{Sb}_4\text{Ge}_2\text{S}_{32-x}$  ( $x = 0, 0.5, 1.0, 1.5$ ).

Table S1. Chemical compositions for the sintered samples of  $\text{Cu}_{26}\text{Ti}_2\text{Sb}_4\text{Ge}_2\text{S}_{32-x}$  ( $x = 0, 0.5, 1.0, 1.5$ ). The standard deviation of the composition is given in the parentheses. Here, the total composition of Cu, Ti, Sb, and Ge was assumed to be 34. The S compositions is much smaller than the starting composition, which may be mainly due to the experimental/analytical error of the energy dispersive X-ray spectroscopy.

| $x$ | Cu      | Ti     | Sb     | Ge     | S       |
|-----|---------|--------|--------|--------|---------|
| 0   | 26.1(2) | 1.9(1) | 4.1(2) | 1.8(3) | 29.6(5) |
| 0.5 | 26.2(2) | 1.9(2) | 4.2(1) | 1.7(3) | 29.3(3) |
| 1.0 | 26.2(3) | 1.8(1) | 4.2(1) | 1.8(3) | 29.1(5) |
| 1.5 | 26.1(3) | 1.8(2) | 4.2(1) | 1.9(3) | 28.5(4) |

Table S2. Hole carrier concentration,  $n$ , and total thermal conductivity,  $\kappa$ , at room temperature for  $\text{Cu}_{26}\text{Ti}_2\text{Sb}_4\text{Ge}_2\text{S}_{32-x}$ .

| Sample                                                                 | $n / 10^{21} \text{ cm}^{-3}$ | $\kappa / \text{W K}^{-1} \text{ m}^{-1}$ |
|------------------------------------------------------------------------|-------------------------------|-------------------------------------------|
| $x = 0$                                                                | 3.49                          | 2.63                                      |
| $x = 0.5$                                                              | 2.37                          | 1.74                                      |
| $x = 1.0$                                                              | 1.77                          | 1.42                                      |
| " $\text{Cu}_{26}\text{Ti}_2\text{Sb}_4\text{Ge}_2\text{S}_{32}$ " [1] | 1.52                          | 1.27                                      |
| $x = 1.5$                                                              | 0.89                          | 0.93                                      |

[1] Hagiwara, K. Suekuni, P. Lemoine, A. R. Supka, R. Chetty, E. Guilmeau, B. Raveau, M. Fornari, M. Ohta, R. Al Rahal Al Orabi, H. Saito, K. Hashikuni and M. Ohtaki, *Chemistry of Materials*, 2021, **33**, 3449–3456.

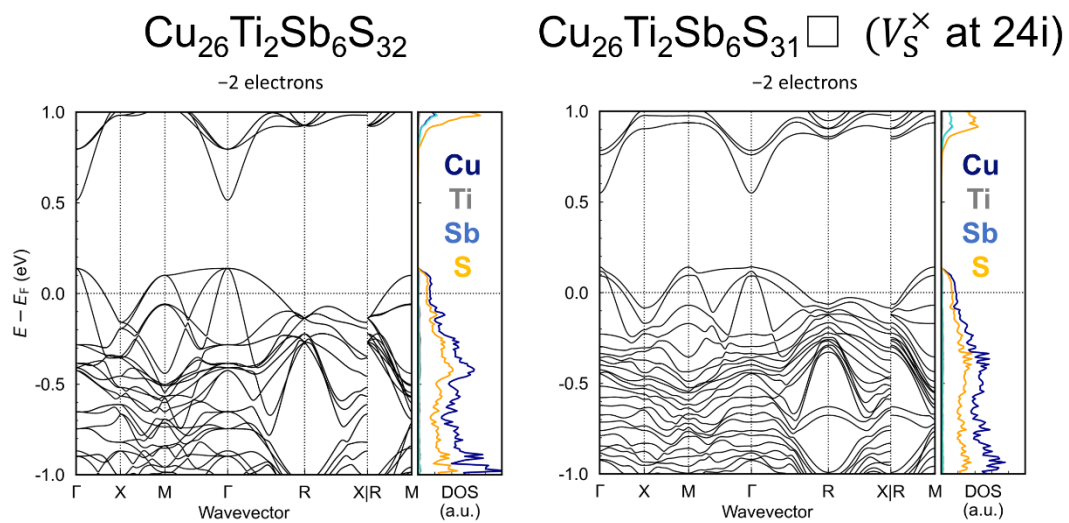

Figure S2. Electronic band dispersion relations and element-projected density of states for  $\text{Cu}_{26}\text{Ti}_2\text{Sb}_6\text{S}_{32}$  and  $\text{Cu}_{26}\text{Ti}_2\text{Sb}_6\text{S}_{31}\square$  (see Fig. S3 for the structures).

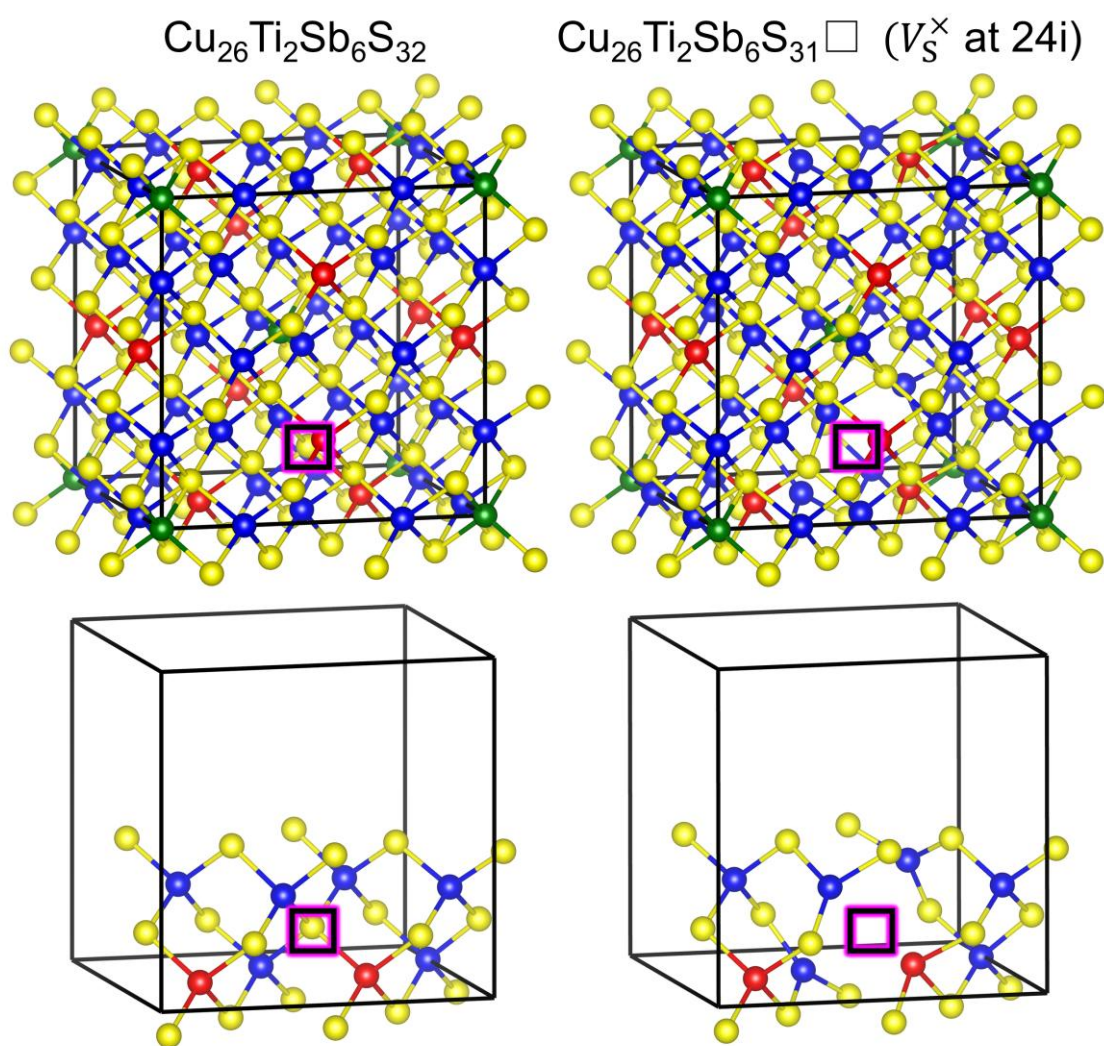

Figure S3. Relaxed structures of  $\text{Cu}_{26}\text{Ti}_2\text{Sb}_6\text{S}_{32}$  and  $\text{Cu}_{26}\text{Ti}_2\text{Sb}_6\text{S}_{31}\square$ . For the latter, a sulphur atom was removed from the 24i site.

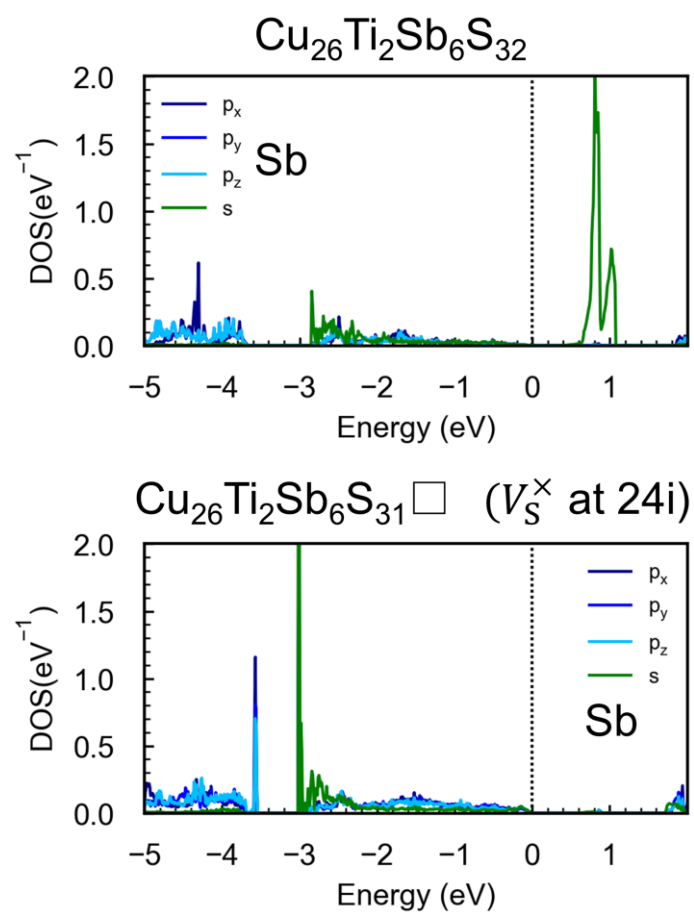

Figure S4. Orbital projected density of states of Sb for  $\text{Cu}_{26}\text{Ti}_2\text{Sb}_6\text{S}_{32}$  and  $\text{Cu}_{26}\text{Ti}_2\text{Sb}_6\text{S}_{31}\square$ . For the latter, localized states appear at -3.0 eV and -3.6 eV.

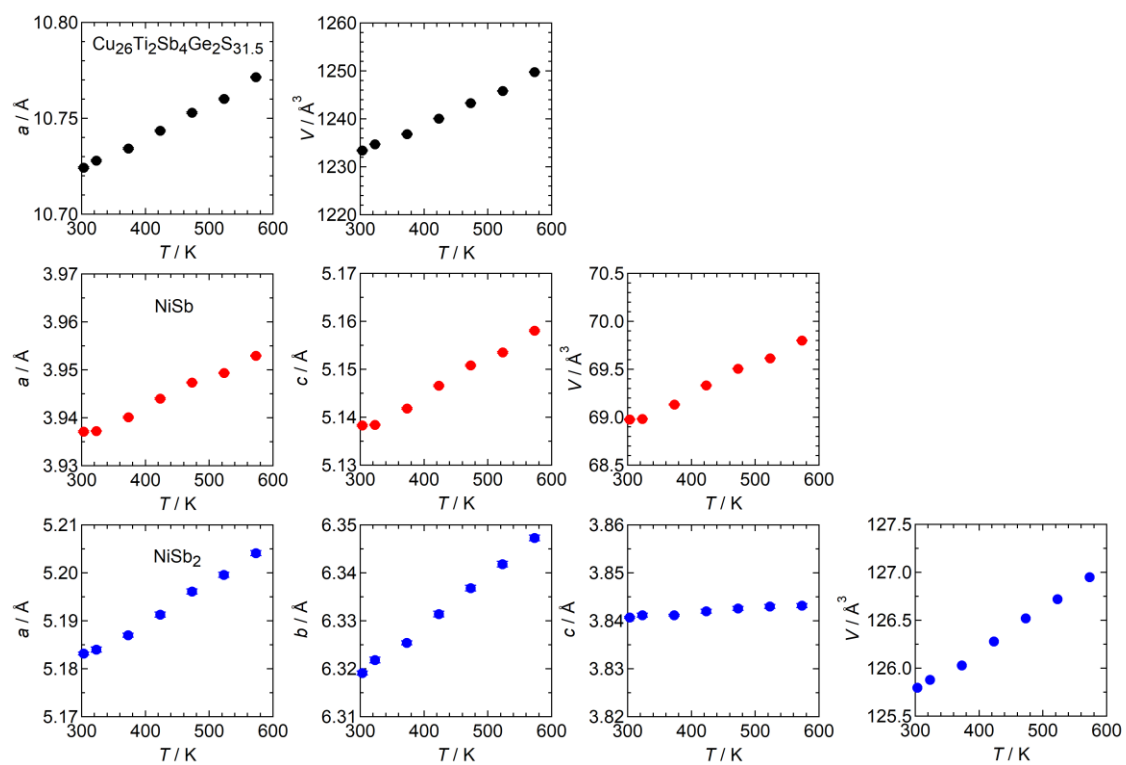

Figure S5. Temperature dependences of the lattice parameters and volume for  $\text{Cu}_{26}\text{Ti}_2\text{Sb}_4\text{Ge}_2\text{S}_{31.5}$  colusite,  $\text{NiSb}$ , and  $\text{NiSb}_2$ .

Ni / Ni<sub>0.9</sub>Cu<sub>0.1</sub>Sb / col.

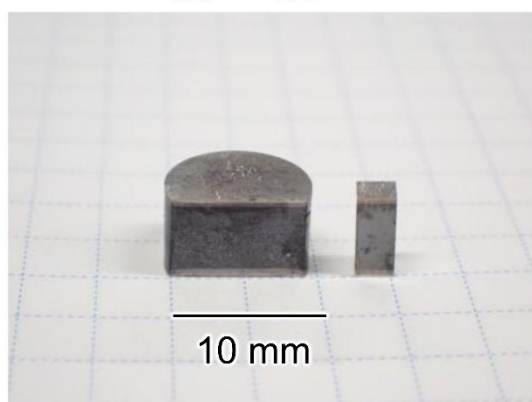

Ni / Ni<sub>0.9</sub>Co<sub>0.1</sub>Sb / col.

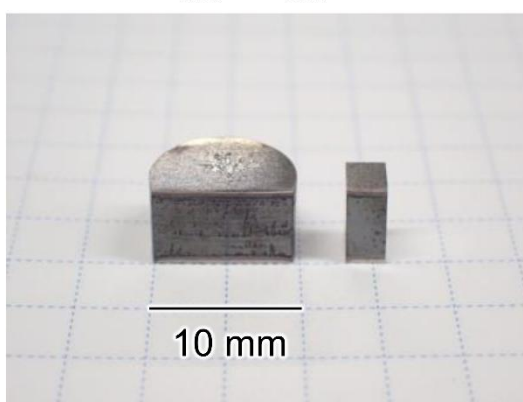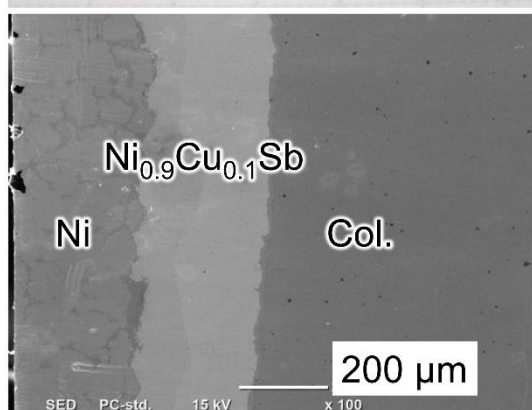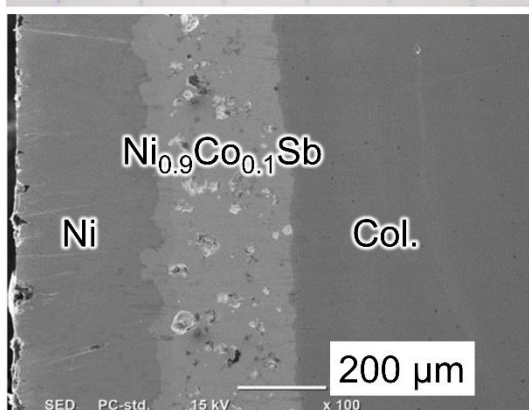

Figure S6. Sintered samples composed of (a) Ni, Ni<sub>0.9</sub>Cu<sub>0.1</sub>Sb, and Cu<sub>26</sub>Ti<sub>2</sub>Sb<sub>4</sub>Ge<sub>2</sub>S<sub>31.5</sub> (col.) layers and (b) Ni, Ni<sub>0.9</sub>Co<sub>0.1</sub>Sb, and col. layers. Secondary electron images of one end of the devices are shown at the lower panels.



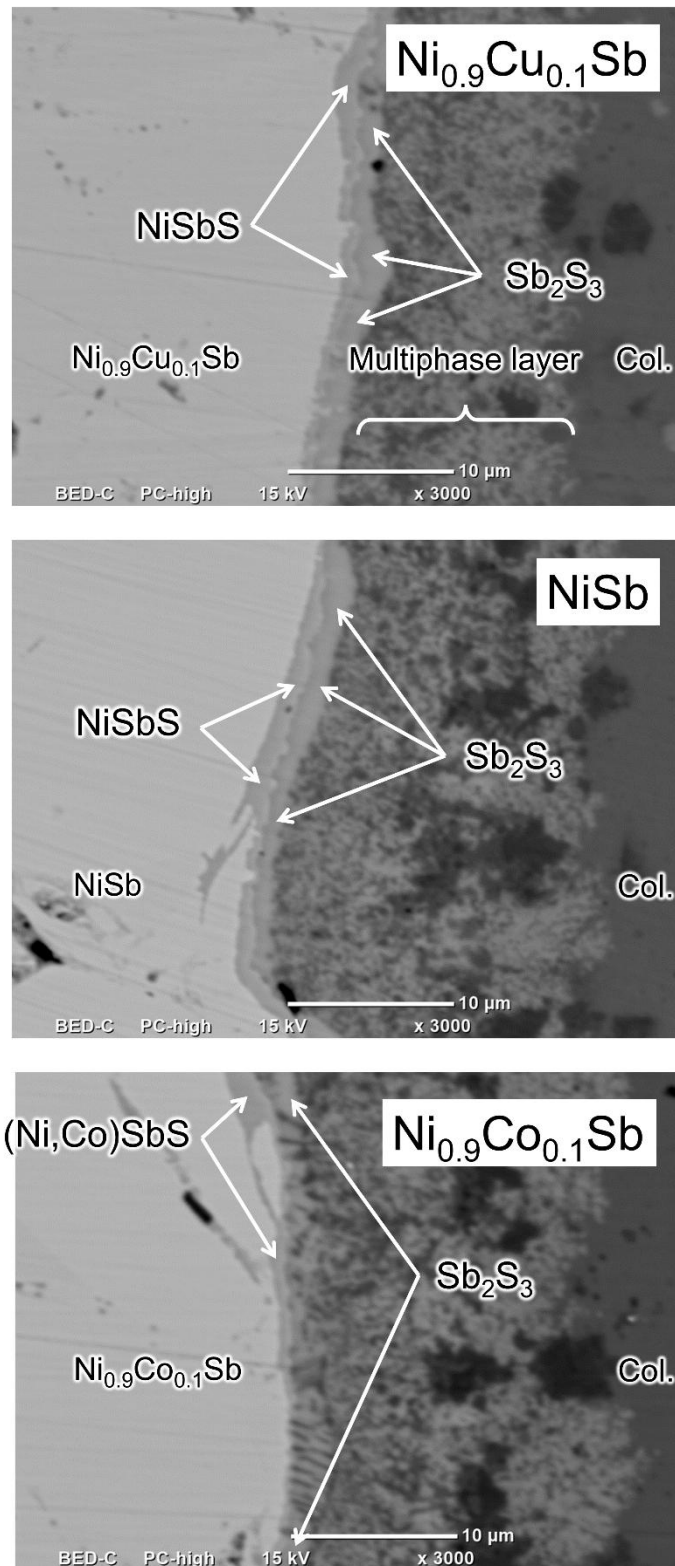

Figure S7. Secondary electron images near the interface between NiSb-based compounds and  $\text{Cu}_{26}\text{Ti}_2\text{Sb}_4\text{Ge}_2\text{S}_{31.5}$  (col.) for the sintered devices.

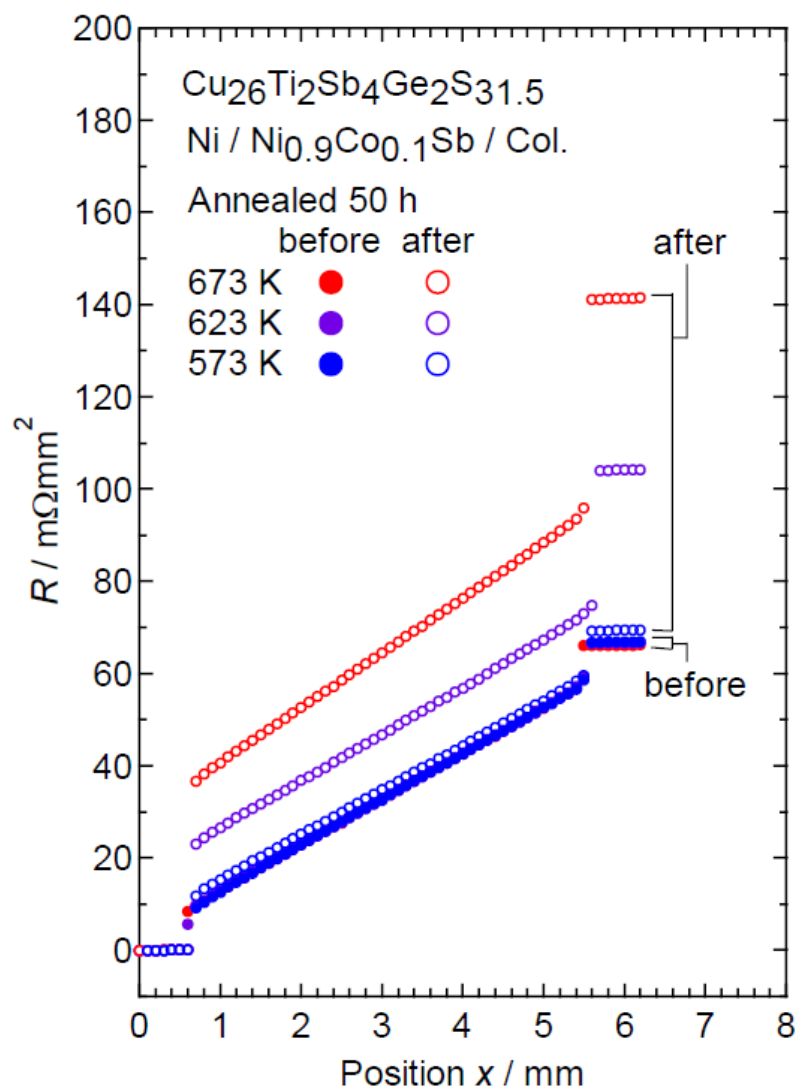

Figure S8. Cumulative electrical resistivity,  $R$ , for the devices composed of Ni,  $\text{Ni}_{0.9}\text{Co}_{0.1}\text{Sb}$ , and  $\text{Cu}_{26}\text{Ti}_2\text{Sb}_4\text{Ge}_2\text{S}_{31.5}$  (col.) before and after annealing at 573 K, 623 K, and 673 K.

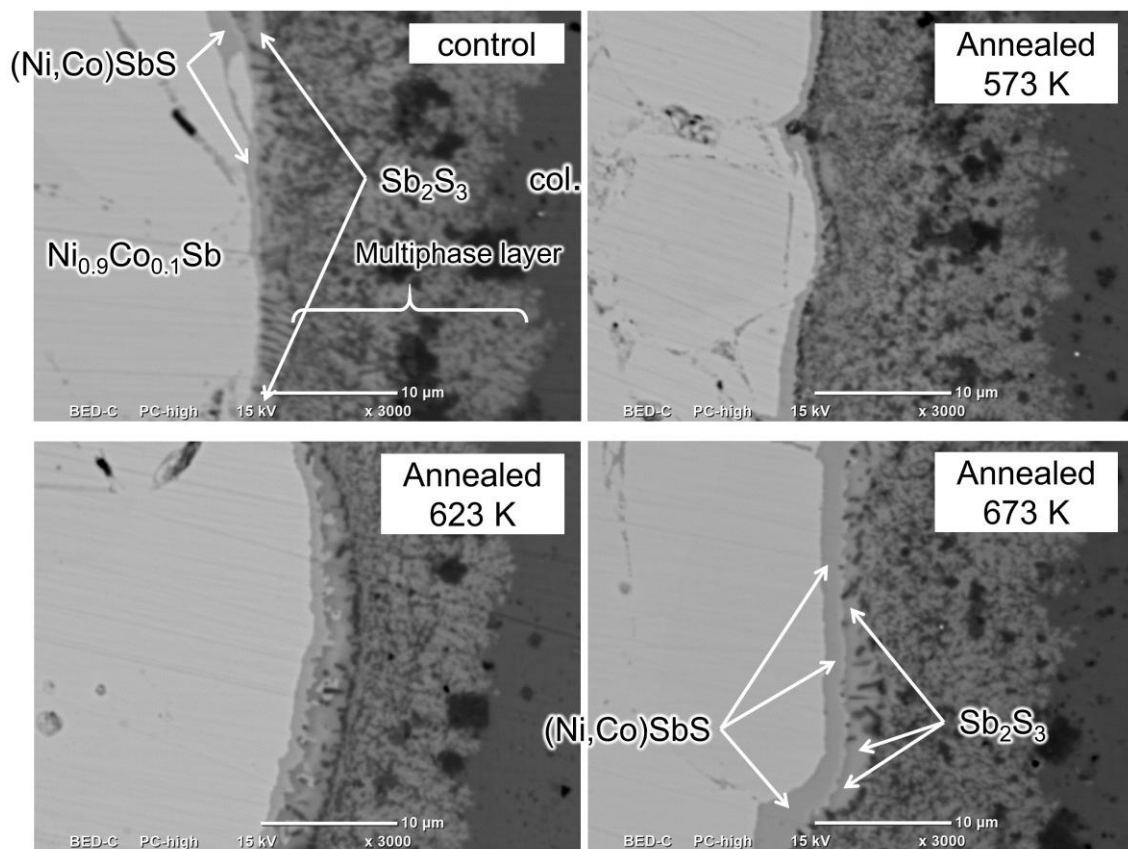

Figure S9. Secondary electron images near the interface between  $\text{Ni}_{0.9}\text{Co}_{0.1}\text{Sb}$  and  $\text{Cu}_{26}\text{Ti}_2\text{Sb}_4\text{Ge}_2\text{S}_{31.5}$  (col.) before and after annealing at 573 K, 623 K, and 673 K.

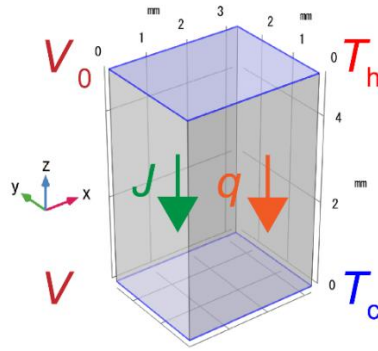

Figure S10. The model used for the finite-element method (FEM) simulation of the  $\text{Cu}_{26}\text{Ti}_2\text{Sb}_4\text{GeS}_{31}$  colusite single leg thermoelectric power generation.[2] The grey surfaces are thermally and electrically insulating. Current density  $J$  and heat flux  $q$  exist perpendicular to the blue surfaces at the hot and cold ends. The voltage  $V$  is the electrical potential difference between the hot and cold side terminals with ground voltage  $V_0$  ( $V = 0$ ) on the hot side. The temperatures on the cold side  $T_c \sim 300$  K and the hot side  $T_H = 368\text{--}670$  K were kept constant while the current density  $J$  was varied to obtain the power generation characteristics.

[2] X. K. Hu, A. Yamamoto, M. Ohta, H. Nishiate; Measurement and simulation of thermoelectric efficiency for single leg, *Rev. Sci. Instrum.* **86**, 045103 (2015).

Table S3. Material's properties (Seebeck coefficient  $S$ , electrical conductivity  $\sigma$ , and total thermal conductivity  $\kappa$ ) and dimensions used for the finite-element method simulation of the  $\text{Cu}_{26}\text{Ti}_2\text{Sb}_4\text{GeS}_{31}$  colusite single leg thermoelectric power generation.

|             |                                 |                                                                                                                                               |
|-------------|---------------------------------|-----------------------------------------------------------------------------------------------------------------------------------------------|
| Dimensions  | mm                              | $3.177 \times 2.604 \times 5.000$                                                                                                             |
| $S(T)$      | $\text{V K}^{-1}$               | $8.62448 \times 10^{-16} T^4 - 1.15822 \times 10^{-12} T^3 + 4.12827 \times 10^{-10} T^2 + 2.40000 \times 10^{-7} T + 1.13793 \times 10^{-5}$ |
| $\sigma(T)$ | $\text{S m}^{-1}$               | $-1.44243 \times 10^{-6} T^4 + 2.88575 \times 10^{-3} T^3 - 1.95244 T^2 + 3.35079 \times 10^2 T + 1.14890 \times 10^5$                        |
| $\kappa(T)$ | $\text{W K}^{-1} \text{m}^{-1}$ | $-4.28138 \times 10^{-12} T^4 + 5.07157 \times 10^{-9} T^3 + 4.95317 \times 10^{-7} T^2 - 3.40354 \times 10^{-3} T + 2.27943$                 |

Table S4. Finite-element method (FEM) simulation of the thermoelectric power generation of a  $\text{Cu}_{26}\text{Ti}_2\text{Sb}_4\text{GeS}_{31}$  colusite single leg at hot side temperature  $T_H$  and cold side temperature  $T_C$ ; open-circuit voltage  $V_{OC}$  and internal resistance  $R_{in}$ ; output power  $P$  and heat released to the cold side  $Q_{out}$  under the condition achieving maximum conversion efficiency  $\eta_{max}$ .

| $T_H / \text{K}$ | $T_C / \text{K}$ | $V_{OC} / \text{mV}$ | $R_{in} / \text{m}\Omega$ | $P / \text{mW}$ | $Q_{out} / \text{mW}$ | $\eta_{max} / \%$ |
|------------------|------------------|----------------------|---------------------------|-----------------|-----------------------|-------------------|
| 368.8            | 295.3            | 7.69                 | 6.12                      | 2.40            | 182                   | 1.30              |
| 466.5            | 296.7            | 19.8                 | 6.94                      | 14.1            | 404                   | 3.38              |
| 566.5            | 300.2            | 34.2                 | 8.07                      | 36.4            | 607                   | 5.65              |
| 670              | 300              | 51.8                 | 9.59                      | 71.7            | 817                   | 8.08              |

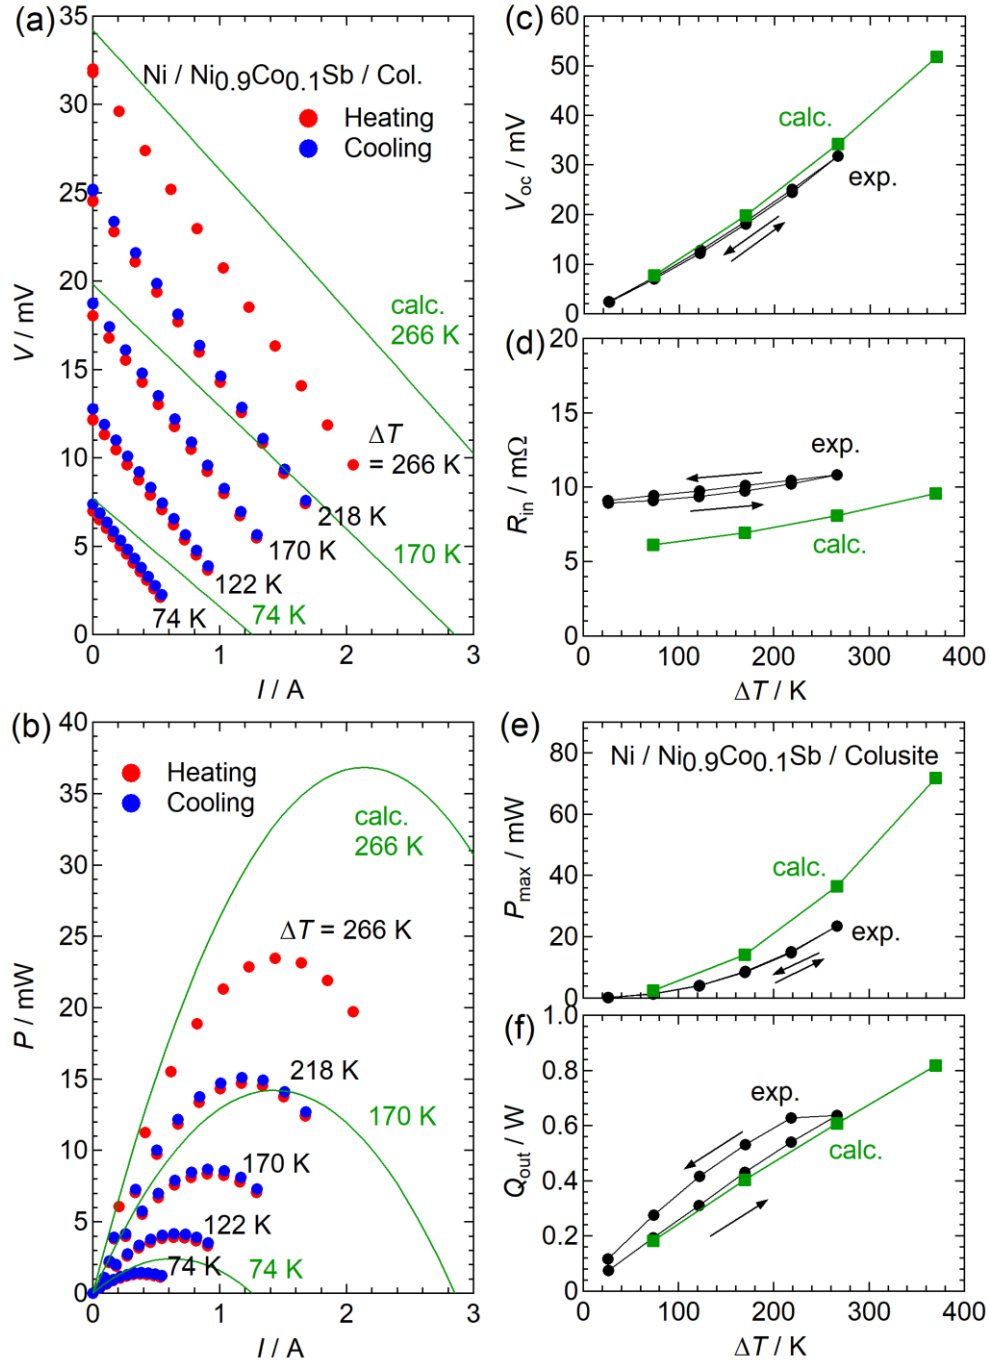

Figure S11. (a) Voltage-current ( $V$ - $I$ ) plot, (b) output power  $P$ , (c) open circuit voltage,  $V_{oc}$ , (d) internal resistance,  $R_{in}$ , and (e) output power,  $P_{max}$ , and (f) heat released into the low-temperature heat bath through the sample,  $Q_{out}$ , under the condition achieving maximum conversion efficiency  $\eta_{max}$  (Fig. 5e) for the device composed of Ni, Ni<sub>0.9</sub>Co<sub>0.1</sub>Sb, and Cu<sub>26</sub>Ti<sub>2</sub>Sb<sub>4</sub>Ge<sub>2</sub>S<sub>31.5</sub> (see Fig. S6). Solid lines in (a, b) and closed squares in (c-f) are the calculated data based on the thermoelectric properties of Cu<sub>26</sub>Ti<sub>2</sub>Sb<sub>4</sub>Ge<sub>2</sub>S<sub>31</sub>.
